# Supplementary material
Source: publisher figshare collection journal article supplement (https://acs.figshare.com/ndownloader/files/4794625)
Supplement: Supplementary file 1 [file 4794625]

Compound	SMILES	rTRPA1 IC50 (�M)	hTRPA1 IC50 (�M)
4	Cc1cccc2c1ncn(c2=O)CC(=O)NCCc3ccc(cc3)OC(F)F	0.142	0.685
5	Cc1cccc2c1ncn(c2=O)CC(=O)NCCc3ccccc3	U	>8.33
6	Cc1cccc2c1ncn(c2=O)CC(=O)NCCc3ccc(cc3)OC	1.37	U
7	Cc1cccc2c1ncn(c2=O)CC(=O)NCCc3cccc(c3)OC	>16.7	>16.7
8	Cc1cccc2c1ncn(c2=O)CC(=O)NCCc3ccccc3OC	>16.7	>16.7
9	Cc1cccc2c1ncn(c2=O)CC(=O)NCCc3ccc(cc3)Cl	0.358	0.802
10	c1ccc2c(c1)c(=O)n(cn2)CC(=O)NCCc3ccc(cc3)Cl	U	>16.7
11	Cc1ccc2c(c1)ncn(c2=O)CC(=O)NCCc3ccc(cc3)Cl	>16.7	>4.2
12	Cc1ccc2c(c1)c(=O)n(cn2)CC(=O)NCCc3ccc(cc3)Cl	0.287	0.265
13	Cc1cccc2c1c(=O)n(cn2)CC(=O)NCCc3ccc(cc3)Cl	0.112	0.07
14	c1cc2c(c(c1)C(F)(F)F)ncn(c2=O)CC(=O)NCCc3ccc(cc3)Cl	0.306	0.286
15	c1cc2c(c(c1)F)ncn(c2=O)CC(=O)NCCc3ccc(cc3)Cl	0.791	1.33
16	O=C1C2=CC=CC(OC)=C2N=CN1CC(NCCC3=CC=C(Cl)C=C3)=O	2.15	1.46
17	c1cc(c2c(c1)c(=O)n(cn2)CC(=O)NCCc3ccc(cc3)Cl)C#N	0.056	0.201
18	c1cc2c(nc1)ncn(c2=O)CC(=O)NCCc3ccc(cc3)Cl	1.17	1.18
19	c1cc(ccc1CCNC(=O)Cn2cnc3cnccc3c2=O)Cl	1.08	1.71
20	c1cc2c(nc1)ncn(c2=O)Cc3nc(on3)CCc4ccc(cc4)Cl	0.089	0.156
21	c1cc2c(nc1)ncn(c2=O)Cc3nc(no3)CCc4ccc(cc4)Cl	0.021	0.041
22	c1cc2c(nc1)ncn(c2=O)Cc3nnc(o3)CCc4ccc(cc4)Cl	1.4	2.18
23	c1cc(ccc1CCc2nc(on2)Cn3cnc4c(c3=O)ccnn4)Cl	0.176	0.136
24	c1cc(ccc1CCc2nc(on2)Cn3cnc4c(c3=O)cncn4)Cl	0.113	0.153
25	c1cc(ccc1CCc2nc(on2)Cn3cnc4c(c3=O)nccn4)Cl	0.314	0.918
26	Cc1ccnc2c1c(=O)n(cn2)Cc3nc(no3)CCc4ccc(cc4)Cl	0.035	0.016
27	Cn1cnc2c1c(=O)n(cn2)Cc3nc(no3)CCc4ccc(cc4)Cl	0.024	0.02
28	Cn1cnc2c1c(=O)n(cn2)Cc3nc(on3)CCc4ccc(cc4)Cl	0.136	0.211
29	Cn1c2c(cn1)ncn(c2=O)Cc3nc(no3)CCc4ccc(cc4)Cl	0.025	0.052
30	c1cc2c(nc1)ncn(c2=O)Cc3nc(no3)CCc4ccc(nc4)Cl	1.38	2.12
31	c1cc2c(nc1)ncn(c2=O)Cc3nc(no3)CC(c4ccc(cc4)Cl)O	0.075	0.058
32	c1cc2c(nc1)ncn(c2=O)Cc3nc(no3)CC(c4ccc(cc4)Cl)F	0.031	0.041
33	CC(Cc1nc(no1)Cn2cnc3c(c2=O)cccn3)c4ccc(cc4)Cl	0.105	0.15
34	c1cc2c(nc1)ncn(c2=O)Cc3nc(on3)/C=C/c4ccc(cc4)Cl	0.652	0.933
35	C/C(=C\c1nc(no1)Cn2cnc3c(c2=O)cccn3)/c4ccc(cc4)Cl	0.105	0.116
36	C/C(=C\c1nc(no1)Cn2cnc3c(c2=O)n(cn3)C)/c4ccc(cc4)Cl	0.274	0.165
37	C/C(=C\c1nc(on1)Cn2cnc3c(c2=O)n(cn3)C)/c4ccc(cc4)Cl	0.075	0.071
